# Supplementary material for: Numerical simulation of lead-free vacancy ordered Cs2PtI6 based perovskite solar cell using SCAPS-1D
Source: Royal Society of Chemistry journal article supplement (doi:10.1039/d3ra04176j), 2023-01-01
Supplement: d3ra04176j1.pdf [file d3ra04176j1.pdf]

## Numerical simulation of lead-free vacancy ordered Cs<sub>2</sub>PtI<sub>6</sub> based perovskite solar cell using SCAPS-1D

Akfeen Amjad<sup>a†</sup>, Samina Qamar<sup>a†</sup>, Kalsoom Fatima<sup>a</sup>, Muhammad Sultan<sup>b\*</sup>, Zareen Akhter<sup>a\*</sup>,

<sup>a</sup> Department of Chemistry, Quaid-i-Azam University (QAU), Islamabad 45320, Pakistan. E-mail: [zareenakhter@yahoo.com](mailto:zareenakhter@yahoo.com), [zareen\\_a@qau.edu.pk](mailto:zareen_a@qau.edu.pk)

<sup>b</sup> Department of Physics, Kohsaar University Muree (KUM), Muree (+92) 51-9269174, Pakistan. E-mail: [mssatti79@yahoo.com](mailto:mssatti79@yahoo.com)

### Supplementary Information

#### S1. Effect of MoO<sub>3</sub> thickness (10-100 nm) on device parameters

| MoO <sub>3</sub> thickness(nm) | V <sub>oc</sub> (V) | J <sub>sc</sub> (mA/cm <sup>2</sup> ) | FF (%)   | PCE (%)  |
|--------------------------------|---------------------|---------------------------------------|----------|----------|
| 20                             | 1.03804             | 26.14745                              | 79.81242 | 21.66274 |
| 24                             | 1.11849             | 26.15861                              | 79.10589 | 23.14476 |
| 30                             | 1.13943             | 26.16273                              | 76.03684 | 22.66695 |
| 40                             | 1.14141             | 26.16343                              | 75.77095 | 22.62769 |
| 50                             | 1.14163             | 26.16354                              | 75.74602 | 22.62455 |
| 60                             | 1.14164             | 26.16356                              | 75.74401 | 22.62431 |
| 70                             | 1.14165             | 26.16357                              | 75.74390 | 22.62434 |
| 80                             | 1.14165             | 26.16358                              | 75.74386 | 22.62434 |
| 90                             | 1.14165             | 26.16360                              | 75.74384 | 22.62435 |
| 100                            | 1.14165             | 26.16363                              | 75.74383 | 22.62436 |

#### S2. Effect of Cs<sub>2</sub>PtI<sub>6</sub> thickness (100-1000 nm) on device parameters

| Cs <sub>2</sub> PtI <sub>6</sub> thickness(nm) | V <sub>oc</sub> (V) | J <sub>sc</sub> (mA/cm <sup>2</sup> ) | FF (%)   | PCE (%)  |
|------------------------------------------------|---------------------|---------------------------------------|----------|----------|
| 100                                            | 1.10674             | 14.81709                              | 84.20089 | 13.80776 |
| 200                                            | 1.11805             | 22.22641                              | 82.05535 | 20.39087 |
| 300                                            | 1.11849             | 26.15861                              | 79.10591 | 23.14497 |
| 330                                            | 1.11782             | 26.94972                              | 78.07601 | 23.52040 |
| 400                                            | 1.11550             | 28.34408                              | 75.29937 | 23.80797 |
| 500                                            | 1.11107             | 29.57439                              | 70.60756 | 23.20115 |
| 600                                            | 1.10594             | 30.20621                              | 65.18559 | 21.77602 |
| 700                                            | 1.10035             | 30.36836                              | 59.37677 | 19.84124 |

|      |         |          |          |          |
|------|---------|----------|----------|----------|
| 800  | 1.09450 | 30.04252 | 53.49356 | 17.58954 |
| 900  | 1.08850 | 29.11874 | 47.98291 | 15.20860 |
| 1000 | 1.08226 | 27.46980 | 43.29790 | 12.87225 |

### S3. Effect of SnO<sub>2</sub> thickness (10-100 nm) on device parameters

| SnO <sub>2</sub> thickness(nm) | V <sub>oc</sub> (V) | J <sub>sc</sub> (mA/cm <sup>2</sup> ) | FF (%)   | PCE (%)  |
|--------------------------------|---------------------|---------------------------------------|----------|----------|
| 10                             | 1.11782             | 26.94972                              | 78.07601 | 23.52040 |
| 20                             | 1.11781             | 26.93964                              | 78.07601 | 23.51135 |
| 30                             | 1.11781             | 26.93640                              | 78.07619 | 23.50851 |
| 40                             | 1.11780             | 26.93434                              | 78.07628 | 23.50669 |
| 50                             | 1.11780             | 26.93265                              | 78.07634 | 23.50519 |
| 60                             | 1.11780             | 26.93113                              | 78.07640 | 23.50385 |
| 70                             | 1.11780             | 26.92970                              | 78.07644 | 23.50258 |
| 80                             | 1.11780             | 26.92834                              | 78.07648 | 23.50137 |
| 90                             | 1.11780             | 26.92701                              | 78.07653 | 23.50020 |
| 100                            | 1.11780             | 26.92572                              | 78.07656 | 23.49906 |

### S4. Effect of Cs<sub>2</sub>PtI<sub>6</sub> /SnO<sub>2</sub> interface defect density on device parameters.

| Cs <sub>2</sub> PtI <sub>6</sub> /SnO <sub>2</sub> interface defect density(1/cm <sup>3</sup> ) | V <sub>oc</sub> (V) | J <sub>sc</sub> (mA/cm <sup>2</sup> ) | FF (%)   | PCE (%)  |
|-------------------------------------------------------------------------------------------------|---------------------|---------------------------------------|----------|----------|
| 1×10 <sup>12</sup>                                                                              | 1.11782             | 26.94972                              | 78.07603 | 23.52041 |
| 1×10 <sup>13</sup>                                                                              | 1.11782             | 26.94972                              | 78.07601 | 23.52040 |
| 1×10 <sup>14</sup>                                                                              | 1.11782             | 26.94966                              | 78.07582 | 23.52029 |
| 1×10 <sup>15</sup>                                                                              | 1.11782             | 26.94908                              | 78.07392 | 23.51917 |
| 1×10 <sup>16</sup>                                                                              | 1.11780             | 26.94339                              | 78.05526 | 23.50810 |
| 1×10 <sup>17</sup>                                                                              | 1.11760             | 26.89142                              | 77.88737 | 23.40806 |
| 1×10 <sup>18</sup>                                                                              | 1.11660             | 26.62564                              | 77.09278 | 22.91991 |

### S5. Effect of MoO<sub>3</sub>/Cs<sub>2</sub>PtI<sub>6</sub> interface defect density on device parameters.

| MoO <sub>3</sub> /Cs <sub>2</sub> PtI <sub>6</sub> interface defect density (1/cm <sup>3</sup> ) | V <sub>oc</sub> (V) | J <sub>sc</sub> (mA/cm <sup>2</sup> ) | FF (%)   | PCE (%)  |
|--------------------------------------------------------------------------------------------------|---------------------|---------------------------------------|----------|----------|
| 1×10 <sup>12</sup>                                                                               | 1.15633             | 26.94972                              | 76.42912 | 23.81734 |
| 1×10 <sup>13</sup>                                                                               | 1.11782             | 26.94972                              | 78.07601 | 23.52040 |
| 1×10 <sup>14</sup>                                                                               | 1.06173             | 26.94966                              | 79.65281 | 22.79119 |
| 1×10 <sup>15</sup>                                                                               | 1.00249             | 26.94912                              | 80.82039 | 21.83463 |

|                    |         |          |          |          |
|--------------------|---------|----------|----------|----------|
| $1 \times 10^{16}$ | 0.94543 | 26.94393 | 81.10092 | 20.65927 |
| $1 \times 10^{17}$ | 0.90275 | 26.90611 | 80.47660 | 19.54732 |
| $1 \times 10^{18}$ | 0.88832 | 26.83425 | 79.90022 | 19.03904 |

### S6. Effect of temperature variation (290-400K) on device parameters

| Temperature (K) | $V_{oc}$ (V) | $J_{sc}$ (mA/cm <sup>2</sup> ) | FF (%)   | PCE (%)  |
|-----------------|--------------|--------------------------------|----------|----------|
| 290             | 1.12295      | 26.95364                       | 78.31294 | 23.70195 |
| 300             | 1.11782      | 26.95159                       | 78.07601 | 23.5204  |
| 310             | 1.11217      | 26.94933                       | 77.48610 | 23.22262 |
| 320             | 1.10579      | 26.94705                       | 76.73043 | 22.86239 |
| 330             | 1.09967      | 26.94465                       | 75.75912 | 22.42562 |
| 340             | 1.09090      | 26.94222                       | 74.70142 | 21.95415 |
| 350             | 1.08231      | 26.93983                       | 73.66265 | 21.47668 |
| 360             | 1.07284      | 26.93748                       | 72.72965 | 21.01716 |
| 370             | 1.06255      | 26.93509                       | 71.90821 | 20.57862 |
| 380             | 1.05121      | 26.93278                       | 71.1901  | 20.15398 |
| 390             | 1.03896      | 26.93056                       | 70.54729 | 19.73767 |
| 400             | 1.02557      | 26.92862                       | 69.98351 | 19.32622 |
